# Supplementary material for: High and Low Levels of an NTRK2-Driven Genetic Profile Affect Motor- and Cognition-Associated Frontal Gray Matter in Prodromal Huntington’s Disease
Source: MDPI journal article supplement (doi:10.3390/brainsci8070116), 2018-06-22
Supplement: s1 [file s1]

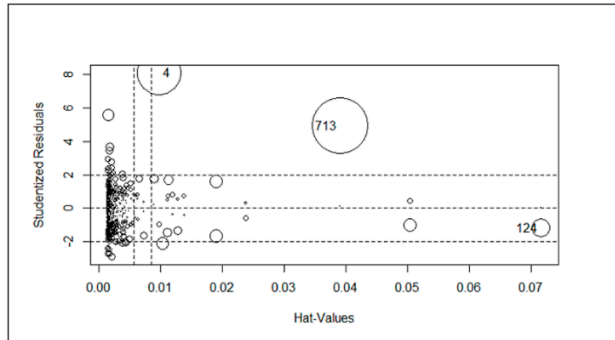

Figure S1. Regression influence analysis in R to identify participants driving the significant frontal GMC - NTRK2 SNP profile correlation. Circles denote observations proportional to Cook's distances, with vertical reference lines at two and three times the average hat value and horizontal reference lines at -2, 0, and 2 on the studentized-residual scale. Numbers within the chart area (e.g., 4, 713, 124) are identifiers that denote individuals driving the significance of the correlation
